# Supplementary material
Source: PubMed Central journal article supplement (PMC5528706)

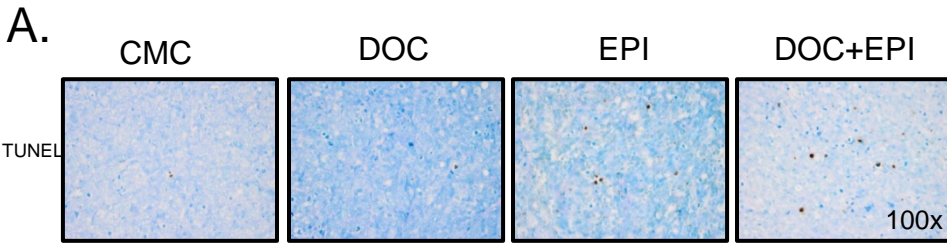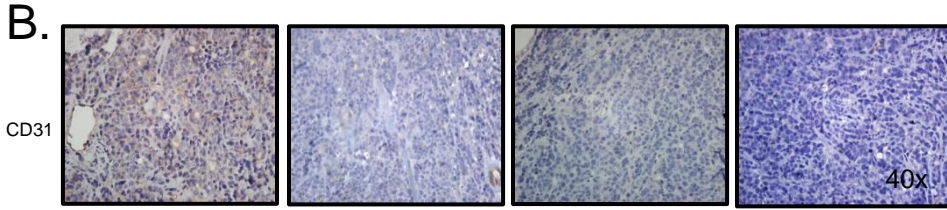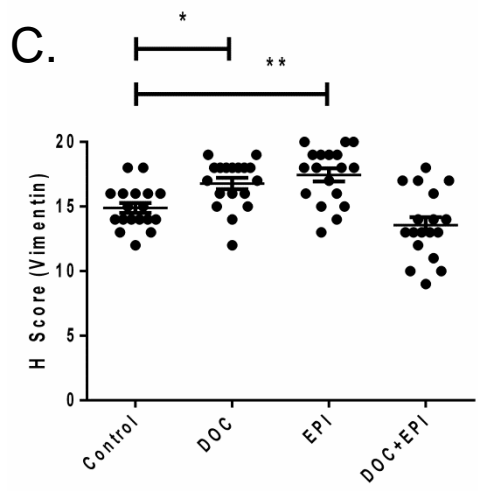

Supplement: MOL2-9-628-s001.pdf [file MOL2-9-628-s001.pdf]

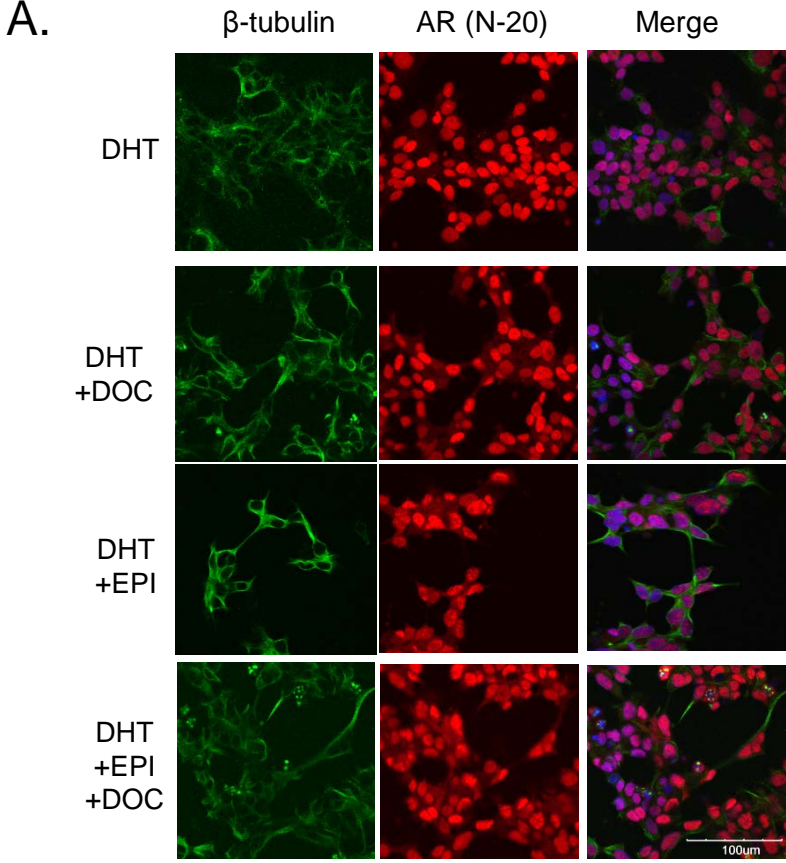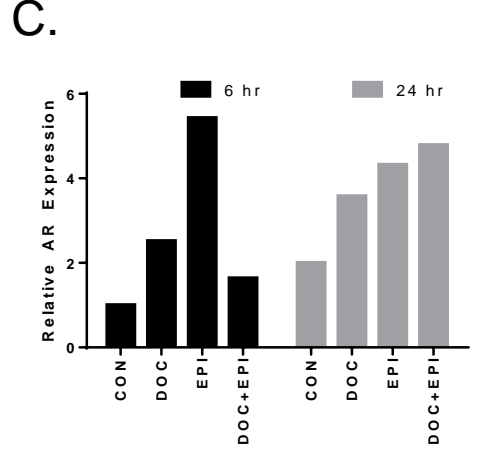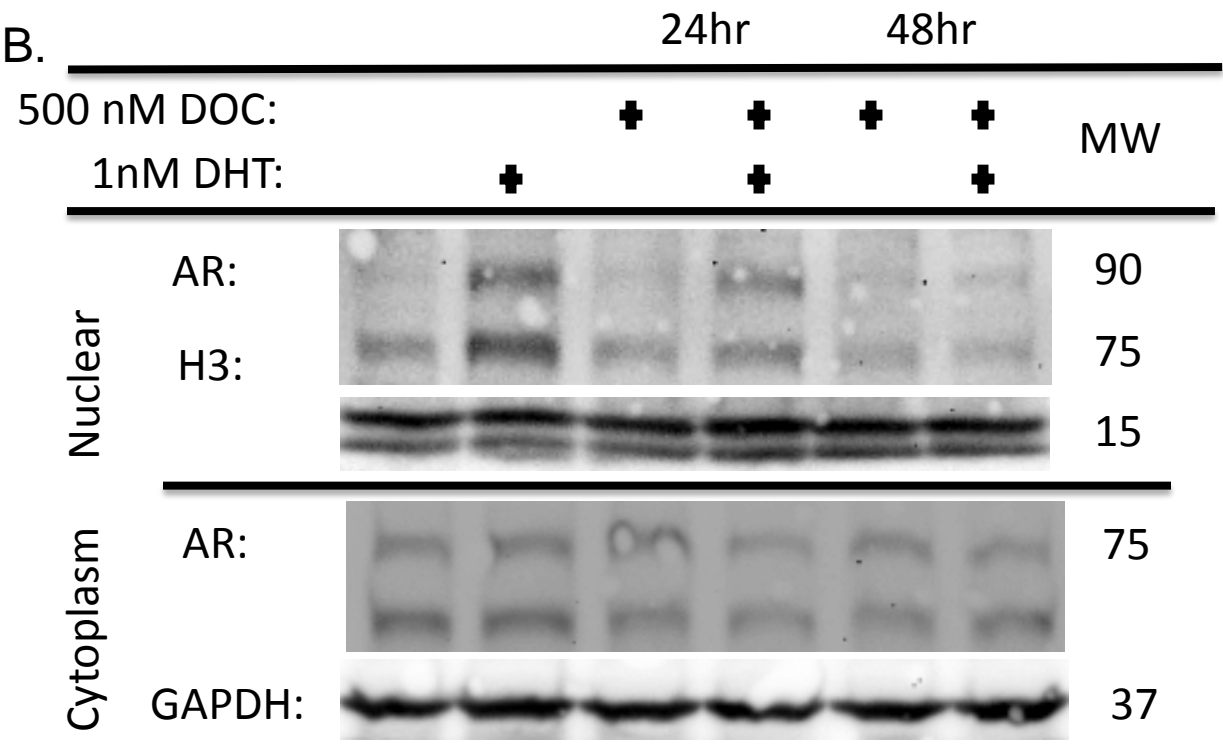

Supplement: MOL2-9-628-s002.pdf [file MOL2-9-628-s002.pdf]

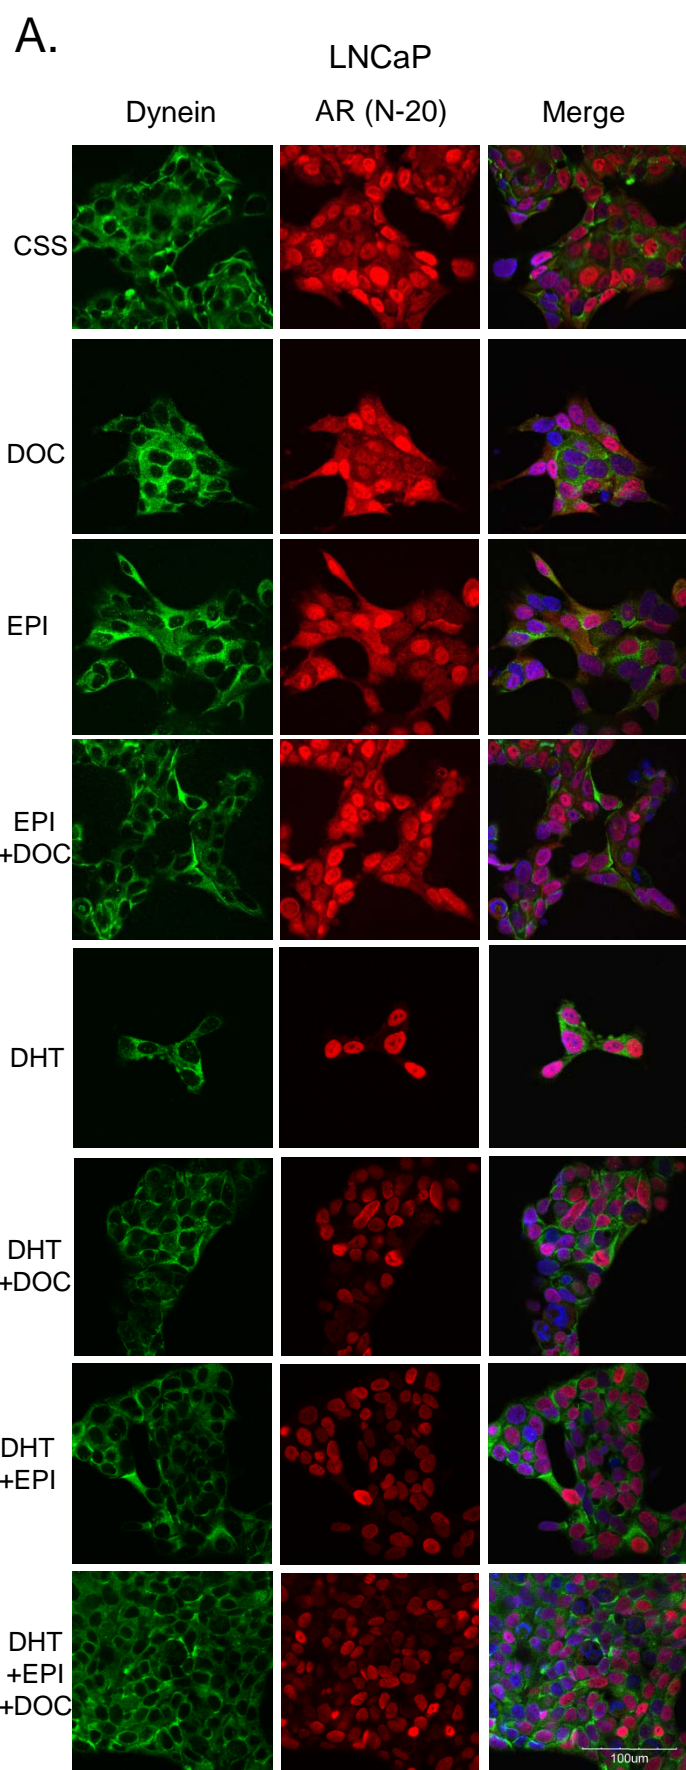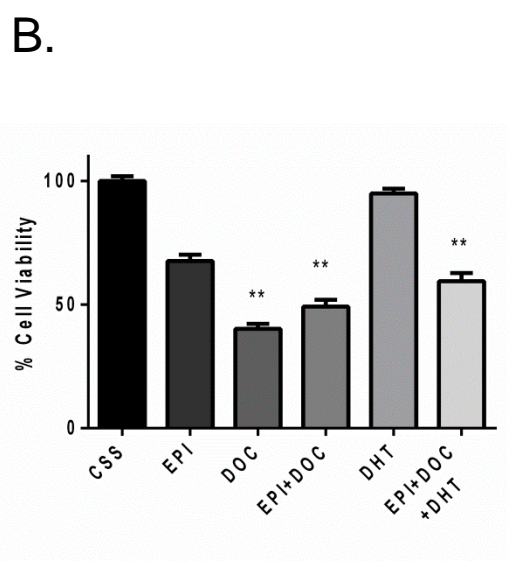

Supplement: MOL2-9-628-s003.pdf [file MOL2-9-628-s003.pdf]

A.

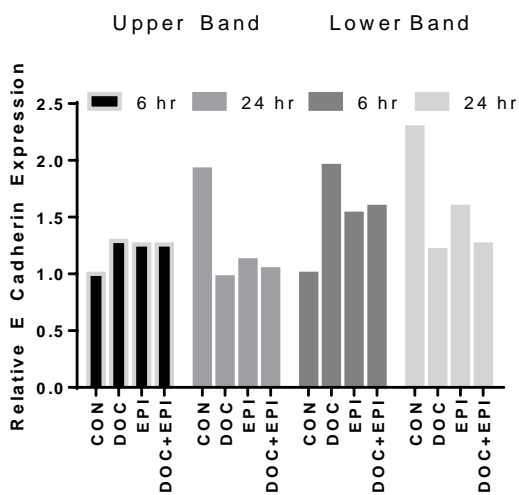

B.

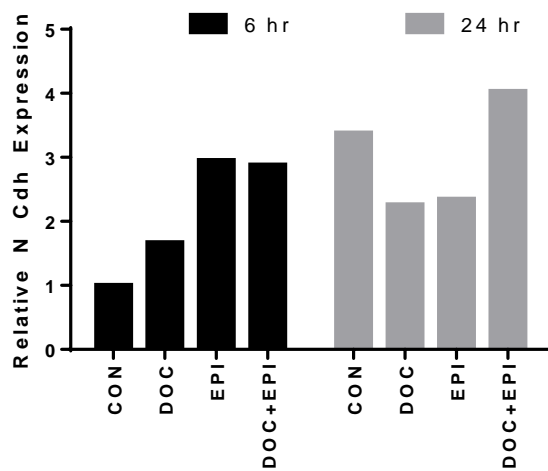

C.

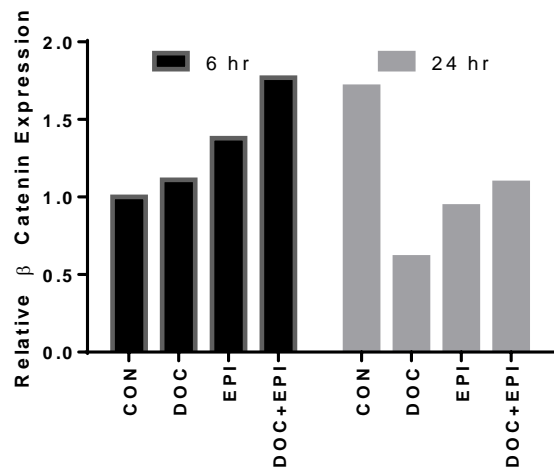

D.

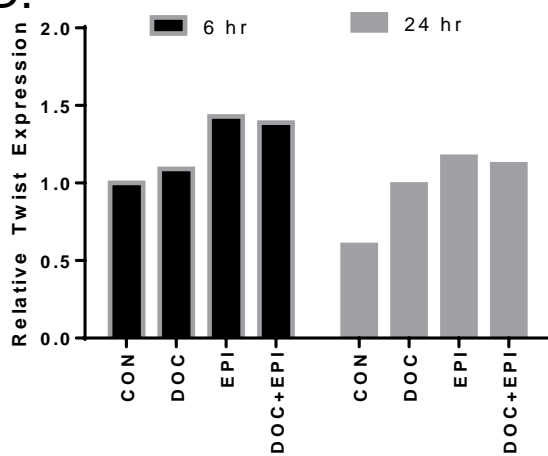

E.

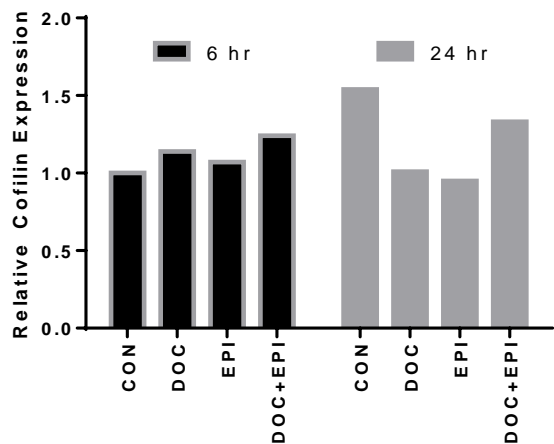

Supplement: MOL2-9-628-s004.pdf [file MOL2-9-628-s004.pdf]

**A.**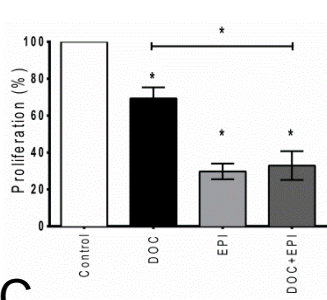**B.**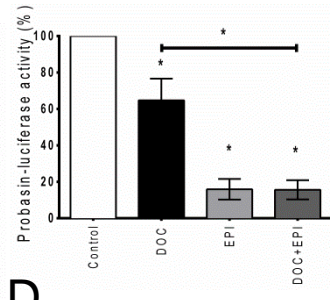**C.**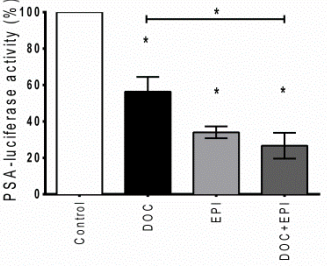**D.**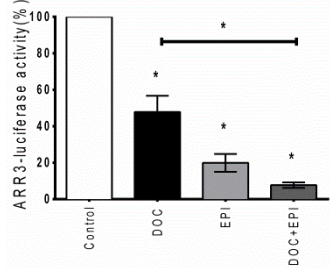**E.**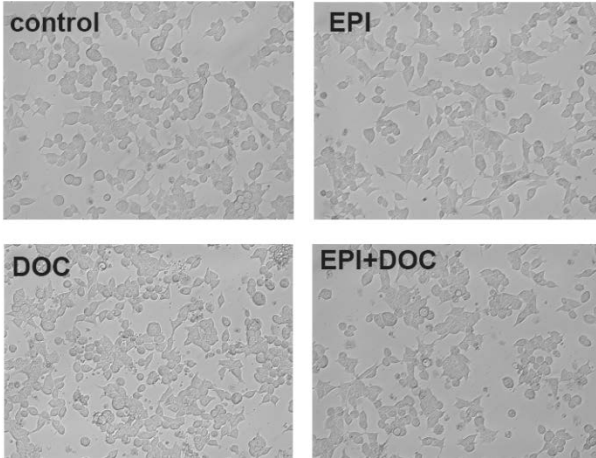

Supplement: MOL2-9-628-s005.pdf [file MOL2-9-628-s005.pdf]
